# Supplementary material for: Green analytical flow method for the determination of total sulfite in wine using membraneless gas–liquid separation with contactless conductivity detection
Source: Royal Society of Chemistry journal article supplement (doi:10.1039/c7ay01879g), 2017-01-01
Supplement: c7ay01879g1.pdf [file c7ay01879g1.pdf]

**Table 1S** Operating steps for the flow manifold in Fig. 2.

| Step | FIA section                                                                                    |     |     |                |                | SIA section                                                                                                                                                                                                                                                  |                 |                             |                             | Duration (s) |
|------|------------------------------------------------------------------------------------------------|-----|-----|----------------|----------------|--------------------------------------------------------------------------------------------------------------------------------------------------------------------------------------------------------------------------------------------------------------|-----------------|-----------------------------|-----------------------------|--------------|
|      | Action                                                                                         | PP1 | PP2 | Position of IV | Position of SV | Action                                                                                                                                                                                                                                                       | SP <sup>a</sup> | Position of SLV1            | Position of SLV2            |              |
| 1    | Draw out vapor from MBL-VP unit                                                                | OFF | ON  | Load           | (W1+W2)-SV-D   | • Aspirate 1,000 µL of H <sub>2</sub> O(1) into syringe                                                                                                                                                                                                      | ↓               | MC2-SLV1-HC                 | H <sub>2</sub> O(1)-SLV2-SP | 10           |
| 2    | Mixing of sample and H <sub>2</sub> SO <sub>4</sub> + Draw out vapor from MBL-VP unit          | ON  | ON  | Load           | (W1+W2)-SV-D   | • Changing SLV1 position<br>• Aspirate 215 µL of air into HC                                                                                                                                                                                                 | ↓               | air-SLV1-HC                 | HC-SLV2- SP                 | 3<br>2       |
| 3    | Mixing of sample and H <sub>2</sub> SO <sub>4</sub> + Draw out vapor from MBL-VP unit          | ON  | ON  | Load           | (W1+W2)-SV-D   | • Changing SLV1 position<br>• Aspirate 100 µL of H <sub>2</sub> O(2) into HC                                                                                                                                                                                 | ↓               | H <sub>2</sub> O(2)-SLV1-HC | HC-SLV2- SP                 | 3<br>1       |
| 4    | Mixing of sample and H <sub>2</sub> SO <sub>4</sub> + Draw out vapor from MBL-VP unit          | ON  | ON  | Load           | (W1+W2)-SV-D   | • Changing SLV1 position<br>• Deliver 100 µL of H <sub>2</sub> O(2) into A1 (with 215 µL of air in line a)                                                                                                                                                   | ↑               | A1-SLV1-HC                  | HC-SLV2- SP                 | 3<br>3       |
| 5    | Mixing of sample and H <sub>2</sub> SO <sub>4</sub> + Draw out vapor from MBL-VP unit          | ON  | ON  | Load           | (W1+W2)-SV-D   | • Changing SLV1 position<br>• Aspirate 215 µL of air into HC                                                                                                                                                                                                 | ↓               | air-SLV1-HC                 | HC-SLV2- SP                 | 3<br>2       |
| 6    | Mixing of sample and H <sub>2</sub> SO <sub>4</sub> + Draw out vapor from MBL-VP unit          | ON  | ON  | Load           | (W1+W2)-SV-D   | • Changing SLV1 position<br>• Aspirate 100 µL of H <sub>2</sub> O(2) into HC                                                                                                                                                                                 | ↓               | H <sub>2</sub> O(2)-SLV1-HC | HC-SLV2- SP                 | 3<br>1       |
| 7    | Mixing of sample and H <sub>2</sub> SO <sub>4</sub> + Switch SV position                       | ON  | ON  | Load           | IV-SV-D        | -                                                                                                                                                                                                                                                            | hold            | H <sub>2</sub> O(2)-SLV1-HC | HC-SLV2- SP                 | 3            |
| 8    | Mixing of sample and H <sub>2</sub> SO <sub>4</sub> + Inject donor zone to rest in reservoir D | ON  | ON  | Inject         | IV-SV-D        | • Changing SLV1 position<br>• Deliver 100 µL of H <sub>2</sub> O(2) into A2 (with 215 µL of air in line b)                                                                                                                                                   | ↑               | A2-SLV1-HC                  | HC-SLV2- SP                 | 3<br>3       |
| 9    | Sample held in reservoir D                                                                     | OFF | OFF | Load           | IV-SV-D        | • Gas diffusion process for A1 and A2                                                                                                                                                                                                                        | hold            | A2-SLV1-HC                  | HC-SLV2- SP                 | 7            |
| 10   | Sample held in reservoir D                                                                     | OFF | OFF | Load           | IV-SV-D        | • Gas diffusion process for A1 and A2 + Changing SLV1 position<br>• Draw the following zone stack from A1 into HC: (65 µL of headspace air) + (100 µL of H <sub>2</sub> O(2)) + (215 µL of air in line a) + gas diffusion process continued for A2           | ↓               | A1-SLV1-HC                  | HC-SLV- SP                  | 3<br>4       |
| 11   | Sample held in reservoir D                                                                     | OFF | OFF | Load           | IV-SV-D        | • Gas diffusion process for A2 + Changing SLV1 position (3 s in 6 s)<br>• Draw the following zone stack from A2 into HC: (185 µL of headspace air) + (100 µL of H <sub>2</sub> O(2)) + (215 µL of air in line b)                                             | ↓               | A2-SLV1-HC                  | HC-SLV2- SP                 | 6<br>5       |
| 12   | Draw out donor solution and vapor from MBL-VP unit                                             | OFF | ON  | Load           | (W1+W2)-SV-D   | • Changing SLV1 position<br>• Send the following zone stack from HC into C4D: (185 µL of air) + (100 µL of H <sub>2</sub> O(2) or A2) + (215 µL + 65 µL of air) + (100 µL of H <sub>2</sub> O(2) or A1) + (215 µL of air) ( <i>see the inset of Fig. 3</i> ) | ↑               | C4D-SLV1-HC                 | HC-SLV2- SP                 | 3<br>9       |
| 13   | Draw out donor solution and vapor from MBL-VP unit                                             | OFF | ON  | Load           | (W1+W2)-SV-D   | -                                                                                                                                                                                                                                                            | hold            | C4D-SLV1-HC                 | HC-SLV2- SP                 | 60           |

10 s<sup>b</sup>

20 s<sup>c</sup>

**Table 2S** Parameter range and the selected condition for operating the MBL-VP system.

| <b>Parameter</b>                                                 | <b>Range</b>                               | <b>Selected condition</b> |
|------------------------------------------------------------------|--------------------------------------------|---------------------------|
| Volume of liquid acceptor ( $\mu\text{L}$ )                      | 100 – 200                                  | 100                       |
| Volume of liquid donor ( $\mu\text{L}$ )                         | 100 – 200                                  | 200                       |
| Acid concentration ( $\text{mol L}^{-1}$ )                       | 0 – 1.5                                    | 1.5                       |
| Ethanol content (% v/v) for adjusting the sample/standard medium | 0 – 20                                     | 15                        |
| Diffusion time (s)                                               | A1: 10 – 70<br>A2: 20 – 80                 | A1: 10<br>A2: 20          |
| Aeration                                                         | (i) With aeration<br>(ii) Without aeration | Without aeration          |
| Headspace volume (mL)                                            | 2.82 – 10.60                               | 6.36                      |
| Venting flow rate ( $\text{mL min}^{-1}$ )                       | 15 – 20                                    | 20                        |

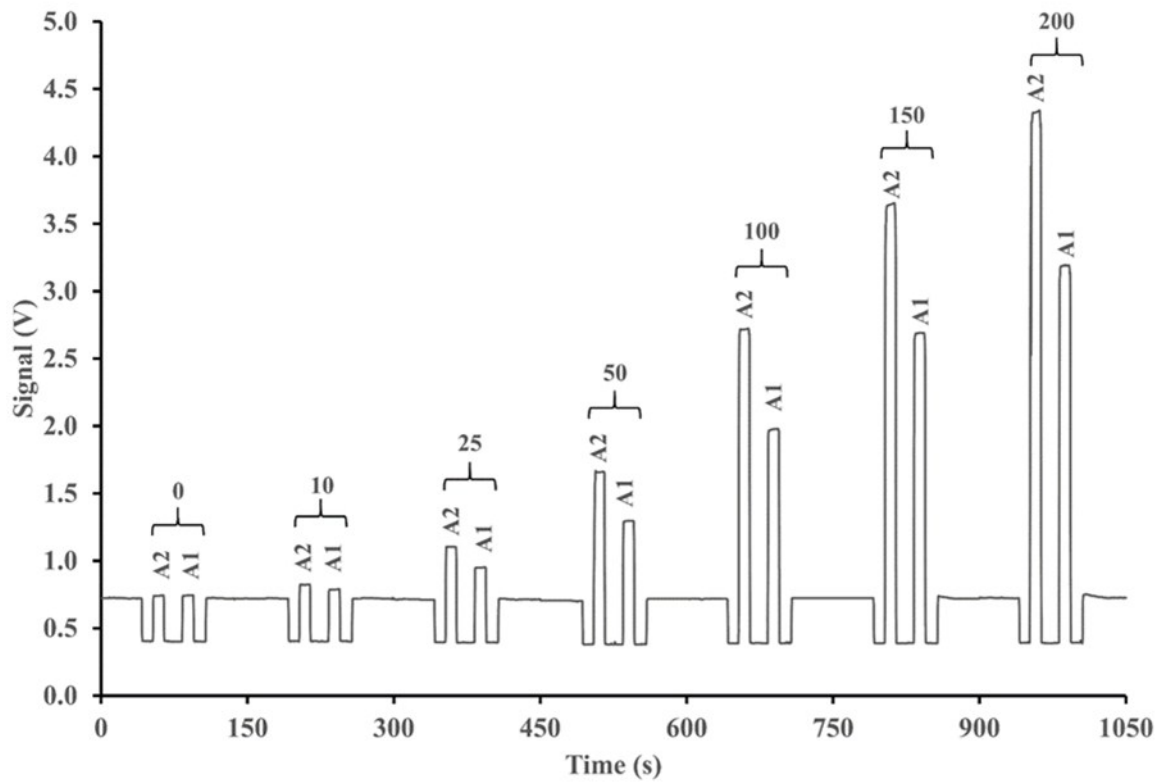

**Fig. 1S** Examples of signal profile showing the signal of acceptor A2, followed by A1, both obtained for various concentrations of sulfite standard (0-200 mg L<sup>-1</sup> sulfite).
